# THE AMERICAN JOURNAL OF PSYCHIATRY

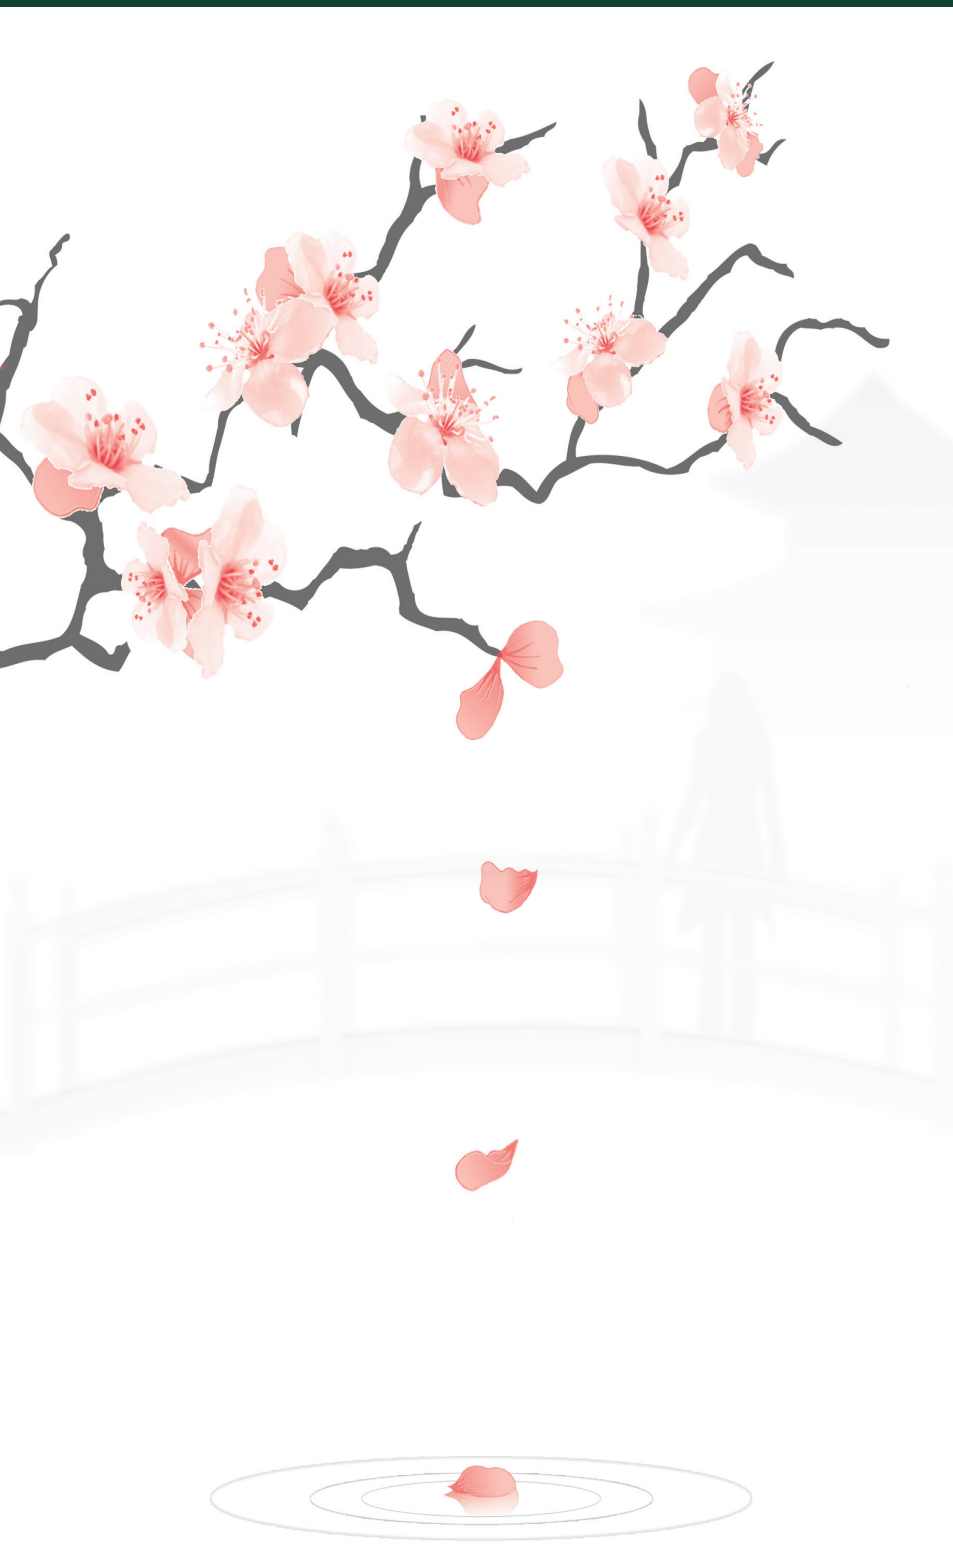

**Research Domain Criteria (RDoC):  
Toward a New Classification  
Framework for Research on  
Mental Disorders**

Thomas Insel, M.D., et al. 748

◀ **Mental Disorders and Suicide  
Among Young Rural Chinese: A  
Case-Control Psychological  
Autopsy Study**

Jie Zhang, Ph.D., et al. 773

**Treatment of Resistant  
Depression in Adolescents  
(TORDIA): Week 24 Outcomes**

Graham J. Emslie, M.D., et al. 782

**Incidence and Predictors of  
Suicide Attempts in DSM-IV Major  
Depressive Disorder: A Five-Year  
Prospective Study**

K. Mikael Holma, M.D., et al. 801

**Continuing Medical Education** 875

**July 2010**

**Volume 167 • Number 7**

---

Official Journal of the  
AMERICAN PSYCHIATRIC ASSOCIATION

---

[ajp.psychiatryonline.org](http://ajp.psychiatryonline.org)
