# READ The American Journal of PSYCHIATRY ONLINE

## ONLINE BENEFITS

### AJP in Advance

Receive key research articles posted on the AJP website well in advance of their appearance in print.

### Back Issue Access

Gain access to back issues starting with Volume 1, Issue 1 of the American Journal of Insanity in 1844. (Available to institutions as a separate one-time purchase.)

### AJP CME

Take interactive quizzes that offer AMA PRA Category 1 Credits™ for selected articles from each issue (with paid subscription to the CME Course Program).

### AJP Audio

Listen to MP3-format program summarizing findings from key articles from each issue.

### Residents' Journal

Read additional AJP articles and features that have most value to residents in their training.

### Powerful Searching

Search by author, keyword, and/or citation details—within any one journal, across the entire PsychiatryOnline journal collection, or across all HighWire journals.

### PubMed, CrossRef, and Google Scholar links

Explore everything from cited references to abstracts and full text; to similar articles; to other articles by the same lead authors.

### eTOCs

Get advanced email alerts with the table of contents of the latest issue.

ACTIVATE  
NOW!

IT'S AS EASY AS...

2 Under  
SUBSCRIBE  
NOW, click  
"Activate  
Your Online  
Access"

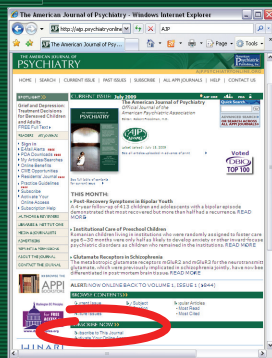

3 Enter your APA Member Number. (This  
can be found on your mailing label.)

AJE 3000056866 CAR-RT LOT88 C-105  
John Q Sample  
Mental Health Professional  
1000 Wilson Blvd STE 1825  
Arlington VA 22209-3924 01654

\*In most cases the number on your label will be your Member Number; if it is not, enter your APA Member Number (with enough leading zeros to create 10 digits).

For more information or if you cannot locate your customer number, please contact APPI Customer Service:

1.800.368.5777  
APPI@PSYCH.ORG

# get CME from AJP

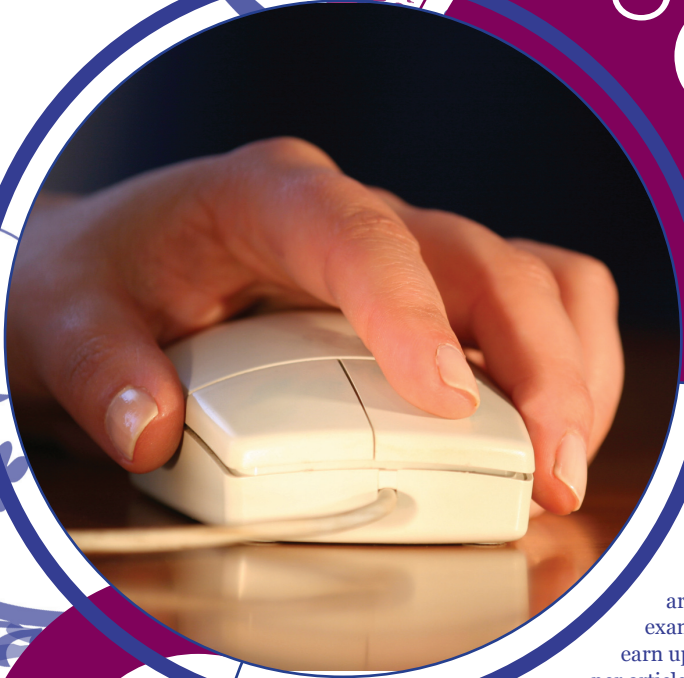

Brief companion exams are created for three of the most influential articles from each issue. By reading the articles and completing the online exams, you can test your knowledge and earn up to 1 *AMA PRA Category 1 Credit*<sup>™</sup> per article. Correct answers are highlighted for your reference upon completion of the course; there is no minimum threshold score necessary for the credit. A

link from the question to the correct answer in context will also be highlighted in the associated article, thus extending the learning experience.

CME credit is only provided online, and a subscription to the AJP CME program is required. From the moment you subscribe to the AJP CME program, you will be able to select from 72 courses from among 40 possible subject areas. You'll also be able to access the next 33 courses as they become available. For more information and pricing, please go to <http://cme.psychiatryonline.org/misc/aboutajpcme.shtml>

This activity is sponsored by the American Psychiatric Association. The American Psychiatric Association is accredited by the Accreditation Council for Continuing Medical Education to provide continuing medical education for physicians. The American Psychiatric Association designates each educational activity for a maximum of 1 *AMA PRA Category 1 Credit*<sup>™</sup>. Physicians should only claim credit commensurate with the extent of their participation in the activity.

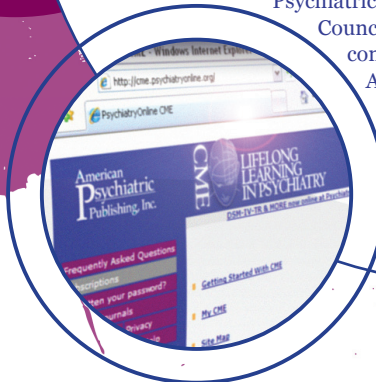

Fulfill your CME requirement while staying current on the latest advances in psychiatry.  
Subscribe to AJP CME!

# The Residents' JOURNAL

Last Issue's

## Table of Contents

- 1 Editorial  
Sarah B. Johnson, M.D.
- 2 Understanding Suicide: An Interview With Dr. Nancy Rappaport  
Ruth Gerson, M.D.
- 4 New Outlook on an Old Problem: Antisocial Personality Disorder  
Partam Manalaj, M.D.
- 5 An Education  
Matthew L. Prowler, M.D.
- 6 The Cocoon of Countertransference  
Deepak Kumar, M.D.
- 7 Neurosyphilis: A Case Report and Review of the Literature  
Ashley R. Sholes, M.D.
- 10 Walking Out the Door  
Tracey Nicole Liebman, B.A.

The Residents' Journal is sent free-of-charge to all psychiatry residents. Anyone interested in being included on the distribution list should contact Angela Moore, the Residents' Journal staff editor at [ajp@psych.org](mailto:ajp@psych.org) with "Subscribe to Residents' Journal" in the subject line.

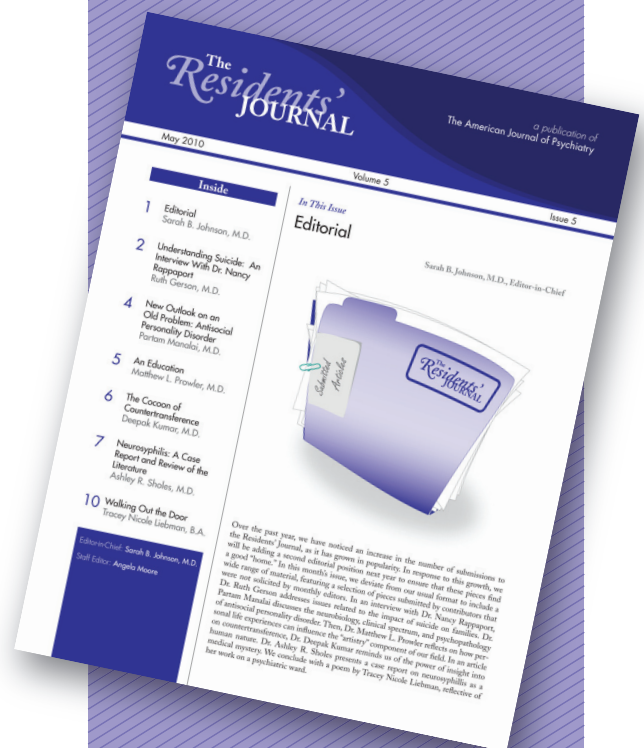

a publication of  
The American Journal of Psychiatry

**A1 Editorial Board**

**A3 Highlights of this issue**

**Editorials**

- 1 The Fair Deal campaign: a call to arms**  
M.P. Deahl
- 3 Insights into schizophrenia using positron emission tomography: building the evidence and refining the focus**  
N.S. Vyas, N.H. Patel, K.S. Nijran, A. Al-Nahhas, and B.K. Puri
- 5 Postcards, green cards and telephone calls: therapeutic contact with individuals following self-harm**  
N. Kapur, J. Cooper, O. Bennewith, D. Gunnell, and K. Hawton

**Reappraisal**

- 8 From inventory to benchmark: quality of psychiatric case registers in research**  
V.A. Morgan and A.V. Jablensky

**Review article**

- 11 Cognitive-behavioural therapy for depression in people with a somatic disease: meta-analysis of randomised controlled trials**  
M.W. Beltman, R.C. Oude Voshaar, and A.E. Speckens
- 19 Mark Lombardi — fallen stars**  
Raymond Cavanaugh Jr

**Papers**

- 20 Childhood adversities as risk factors for onset and persistence of suicidal behaviour**  
R. Bruffaerts, K. Demyttenaere, G. Borges, J.M. Haro, W.T. Chiu, I. Hwang, E.G. Karam, R.C. Kessler, N. Sampson, J. Alonso, L.H. Andrade, M. Angermeyer, C. Benjet, E. Bromet, G. de Girolamo, R. de Graaf, S. Florescu, O. Gureje, I. Horiguchi, C. Hu, V. Kovess, D. Levinson, J. Posada-Villa, R. Sagar, K. Scott, A. Tsang, S.M. Vassilev, D.R. Williams, and M.K. Nock
- 28 Morbid risk for schizophrenia in first-degree relatives of people with frontotemporal dementia**  
D. Schoder, D. Hannequin, O. Martinaud, G. Opolczynski, L. Guyant-Marechal, I. Le Ber, and D. Campion

**36 Psychosocial outcome and psychiatric comorbidity in older adolescents with Tourette syndrome: controlled study**

D.A. Gorman, N. Thompson, K.J. Plessen, M.M. Robertson, J.F. Leckman, and B.S. Peterson

**44 Oedipus wrecked — psychiatry in the movies**  
Peter Byrne

**45 Mental health literacy, folic acid and vitamin B12, and physical activity for the prevention of depression in older adults: randomised controlled trial**  
J.G. Walker, A.J. Mackinnon, P. Batterham, A.F. Jorm, I. Hickie, A. McCarthy, M. Fenech, and H. Christensen

**55 Postcard intervention for repeat self-harm: randomised controlled trial**

A.L. Beautrais, S.J. Gibb, A. Faulkner, D.M. Fergusson, and R.T. Mulder

**60 Tripping for tests: psychostimulant misuse among university students — extra**  
Richard A. Hickman

**61 Somatic symptom overlap in Beck Depression Inventory-II scores following myocardial infarction**  
B.D. Thombs, R.C. Ziegelstein, L. Pilote, D.J.A. Dozois, A.T. Beck, K.S. Dobson, S. Fuss, P. de Jonge, S.L. Grace, D.E. Stewart, J. Ormel, and S.E. Abbey

**66 If Homelessness Were Genetic — poems by doctors**  
Sean Spence

**67 Assessment of adverse effects in clinical studies of antipsychotic medication: survey of methods used**  
A. Pope, C. Adams, C. Paton, T. Weaver, and T.R.E. Barnes

**Short reports**

- 73 Effect of feedback on the quality of suicide prevention websites: randomised controlled trial**  
A.F. Jorm, J.-A. Fischer, and E. Oh

**Columns**

- 75 Correspondence**
- 77 Correction**
- 78 Book reviews**
- 80 Contents of Advances in Psychiatric Treatment**
- 81 Contents of the American Journal of Psychiatry**
- 82 From the Editor's desk**



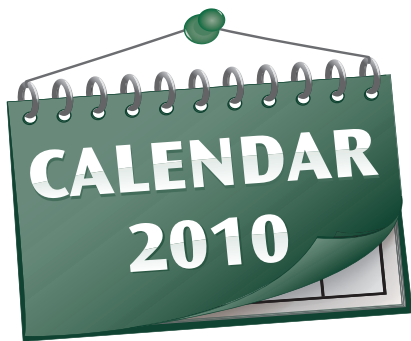

For free listing of your organization's official annual or regional meeting, please send us the following information: sponsor, location, inclusive dates, type and number of continuing education credits (if available), and the name, address, and telephone number of the person or group to contact for more information. In order for an event to appear in our listing, all notices and changes must be received at least 6 months in advance of the meeting and should be addressed to:

**Calendar, American Journal of Psychiatry, 1000 Wilson Boulevard, Suite 1825, Arlington, VA 22209-3901, [jblair@psych.org](mailto:jblair@psych.org) (e-mail).**

Because of space limitations, only listings of meetings of the greatest interest to Journal readers will be included.

---

## JULY

**July 1–3**, 1st International Congress on Borderline Personality Disorder, Berlin Germany. Contact: Thorsten Kienast, MD, [thorsten.kienast@charite.de](mailto:thorsten.kienast@charite.de) (e-mail) 011-49-(0)30-2311 2928 (tel), [www.borderline-congress-org](http://www.borderline-congress-org) (web site).

---

## SEPTEMBER

**September 14–19**, 1st joint annual meeting of the EEG and Clinical Neuroscience Society (ECNS), International Society for Neuroimaging in Psychiatry (ISNIP) and the International Society for Brain Electromagnetic Topography (IS-BET), Istanbul, Turkey. Contact: Kemal Arikian [mkarikan@istanbul.edu.tr](mailto:mkarikan@istanbul.edu.tr) (e-mail) [www.ecns2010.com](http://www.ecns2010.com) (web site).

**September 29–October 3**, Southern Psychiatric Association & Tennessee Psychiatric Association Annual Meeting "Psychiatry on the Verge of DSM V," Asheville, NC. Contact: Susan Proctor, Executive Director, Southern Psychiatric Association, [sproctor@sheppardpratt.org](mailto:sproctor@sheppardpratt.org) (e-mail), (410) 938-3403 (tel), (410) 938-3450 (fax), [www.sopsych.org](http://www.sopsych.org) (web site).

---

## OCTOBER

**October 14–17**, 62nd Institute on Psychiatric Services, American Psychiatric Association, Boston, MA. Contact: Jill Gruber, APA Annual Meetings Dept., 1000 Wilson Blvd., Ste. 1825, Arlington, VA 22209; (703) 907-7815.

**October 22–24**, International Conference on Schizophrenia: ICONS IV, Chennai, India. Contact: Dr.R.Thara, Director, SCARF INDIA, [scarf@vsnl.com](mailto:scarf@vsnl.com), [info@icons-scarf.org](mailto:info@icons-scarf.org) (e-mail).

**October 26–31**, 57th Annual Meeting of the American Academy of Child and Adolescent Psychiatry, New York, NY. Contact: AACAP, 3615 Wisconsin Avenue, N.W., Washington, DC 20016-3007; (202) 966-7300 (tel), (202) 966-2891 (fax), [meetings@aacap.org](mailto:meetings@aacap.org) (e-mail), [www.aacap.org](http://www.aacap.org) (web site).

---

## MAY 2011

**May 14–19**, 164th Annual Meeting of the American Psychiatric Association, Honolulu, HI. Contact: Cathy Nash, APA Annual Meetings Dept., 1000 Wilson Blvd., Ste. 1825, Arlington, VA 22209; (703) 907-7822.

**May 26–29**, 3rd International Congress on ADHD – From Childhood to Adult Disease, Berlin, Germany. Contact: Congress and Exhibition Office: CPO HANSER SERVICE, 011-49-40-670 88 20 (tel), [www.adhd-congress.org](http://www.adhd-congress.org) (web site), [adhd2011@cpo-hanser.de](mailto:adhd2011@cpo-hanser.de) (e-mail).

---

## OCTOBER

**October 5–8**, II International Congress, Dual Disorders, Addictive Behaviors and other Mental Disorders, Barcelona, Spain. Contact: SEPD, [www.cipd2011.com](http://www.cipd2011.com) (web site).

**October 18–23**, 58th Annual Meeting of the American Academy of Child and Adolescent Psychiatry, Toronto, Ontario. Contact: AACAP, 3615 Wisconsin Avenue, N.W., Washington, DC 20016-3007; (202) 966-7300 (tel), (202) 966-2891 (fax), [meetings@aacap.org](mailto:meetings@aacap.org) (e-mail), [www.aacap.org](http://www.aacap.org) (web site).

**October 27–30**, 63rd Institute on Psychiatric Services, American Psychiatric Association, San Francisco, CA. Contact: Jill Gruber, APA Annual Meetings Dept., 1000 Wilson Blvd., Ste. 1825, Arlington, VA 22209; (703) 907-7815.

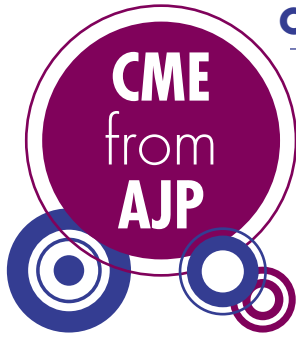

## Continuing Medical Education

Three articles in this issue form the basis of a short course with questions that can be answered for up to 1 *AMA PRA Category 1 Credit™* each by visiting <http://cme.psychiatryonline.org/> and clicking on “American Journal of Psychiatry CME.”

CME credit is issued only online, and a paid subscription to the AJP CME course program is required.

This month’s courses appear on pages 875–878.

FREE AUDIO!

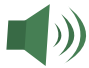

## Have You Heard?

You can listen to highlights of *The American Journal of Psychiatry* by downloading a monthly free .mp3 audio file from our web site (<http://ajp.psychiatryonline.org/misc/audio.dtl>) or by subscribing to the AJP Audio podcast at iTunes or other feed reader (e.g., NewzCrawler, FeedDemon, Bloglines, Google Reader). Presented by Deputy Editor Dr. Susan Schultz or by Editorial Director Michael Roy, each month’s audio lasts approximately 30 minutes and covers several research articles, the Treatment in Psychiatry feature, and one or two editorials.

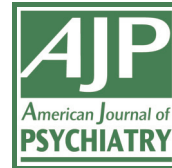

Coming in the August 2010 issue\*

## THE AMERICAN JOURNAL OF PSYCHIATRY

### *Treatment for PTSD Related to Childhood Abuse: A Randomized Controlled Trial*

M. Cloitre, K.C. Stovall-McClough, K. Noonan, P. Zorbas, S. Cherry, C.L. Jackson, W. Gan, and E. Petkova

### *Dysregulation of Regional Endogenous Opioid Function in Borderline Personality Disorder*

A.R. Prossin, T.M. Love, R.A. Koeppe, J.-K. Zubieta, and K.R. Silk

### *Illness Risk Following Rapid Versus Gradual Discontinuation of Antidepressants*

R.J. Baldessarini, L. Tondo, C. Ghiani, and B. Lepri

### *S-Adenosyl Methionine (S-AMe) Augmentation of Serotonin Reuptake Inhibitors for Antidepressant Nonresponders With Major Depressive Disorder: A Double-Blind, Randomized Clinical Trial*

G.I. Papakostas, D. Mischoulon, I. Shyu, J.E. Alpert, and M. Fava

\*Can’t wait? Visit [ajp.psychiatryonline.org](http://ajp.psychiatryonline.org) and click the “AJP in Advance” logo to see all articles uploaded in advance of print!
